# Supplementary material for: Three-dimensional hydrogen distribution and quantitative determination of titanium alloysvianeutron tomography
Source: Royal Society of Chemistry journal article supplement (doi:10.1039/d0an00416b), 2020-01-01
Supplement: d0an00416b1.pdf [file d0an00416b1.pdf]

## Supplementary Information

### Three-dimensional Hydrogen Distribution and Quantitative Determination of Titanium Alloys via Neutron Tomography

Lixia Yang<sup>a</sup>, Linfeng He<sup>\*b</sup>, Danqi Huang<sup>a</sup>, Yaoqi Wang<sup>c</sup>, Quanwei Song<sup>d</sup>, Lei Zhao<sup>a</sup>,  
Xuejing Shen<sup>a</sup>, Zhiling Tian<sup>a</sup>, Haizhou Wang<sup>\*a</sup>

<sup>a</sup> Beijing Advanced Innovation Center for Materials Genome Engineering, Beijing Key  
Laboratory of Metal Materials Characterization, Central Iron and Steel Research Institute,  
Beijing 100081, China

<sup>b</sup> China Institute of Atomic Energy, Beijing 102413, China

<sup>c</sup> AVIC Manufacturing Technology Institute, Beijing 100024, China

<sup>d</sup> CNPC Research Institute of Safety and Environment Technology, Beijing 102206,  
China

#### *Sampling method for neutron tomography experiments:*

There were two large plate Ti-6Al-4V samples used for neutron tomography experiments. Both samples were 172 mm (length)×106 mm (width)×15 mm (thick) in size. One was hydrogenated by THP, the other was unhydrogenated and used as the blank sample. During THP, all six sides of the large plate sample were exposed to hydrogen. In the following the hydrogenated plate sample was cut into four equal sections by wire-electrode cutting. Small specimens (1-1 and 1-2) were cut further from the quarter of the plate sample and the hydrogen-unexposed surfaces (sample interior during THP) were

showed in red dashed line (**Fig. S1**). The blank plate sample was cut in the same way, the corresponding specimen numbers were 0-1 and 0-2.

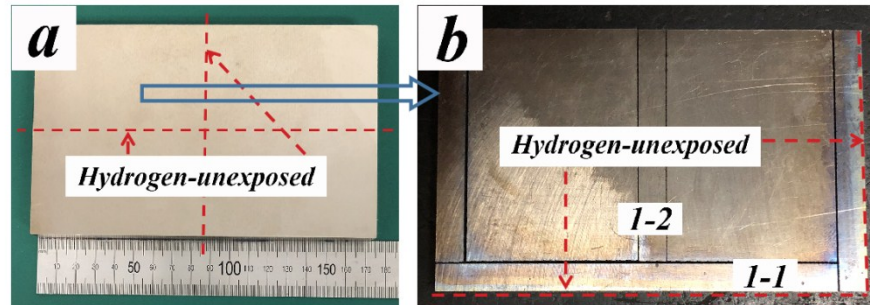

**Fig. S1** Sampling method for neutron tomography experiments. (a) The hydrogenated Ti-6Al-4V sample was cut into four equal sections, (b) Specimen 1-1 and 1-2 was sampled from the quarter of the plate sample, the hydrogen-unexposed surfaces (sample interior) during THP were showed in red dash lines.

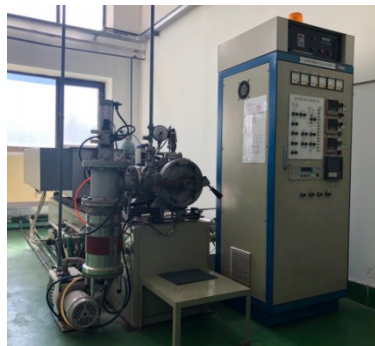

**Fig. S2** The tubular hydrogen treatment furnace and control system made by AVIC Manufacturing Technology Institute.

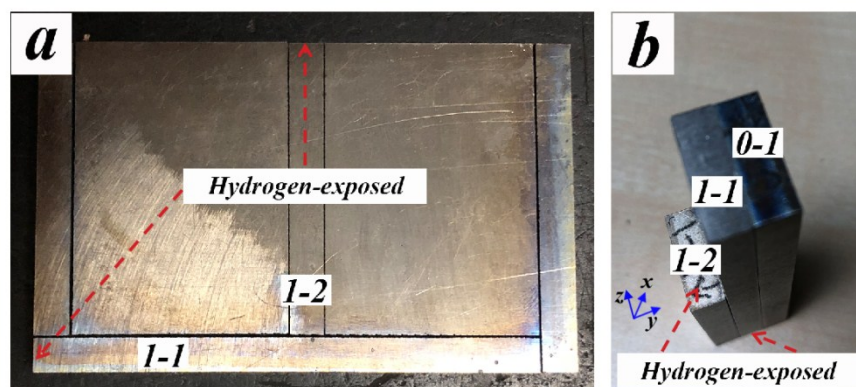

**Fig. S3** The specimens for the neutron tomography experiment. (a) Sampling positions from the quarter of the plate sample, (b) the arrangement of specimens for neutron tomography experiment. The red arrows show the hydrogen-exposed surfaces along  $z$ -direction of the coordinate during neutron tomography experiment.

**Table S1** The attenuation coefficients with neutrons for different elements<sup>1</sup>

| Elements | Attenuation coefficients with neutrons ( $\text{cm}^{-1}$ ) |
|----------|-------------------------------------------------------------|
| Hydrogen | 3.44                                                        |
| Titanium | 0.60                                                        |
| Aluminum | 0.10                                                        |
| Vanadium | 0.72                                                        |

## References:

- 1 N. Kardjilov, R. Woracek and I. Manke, in *Nanotechnologies and Nanomaterials for Diagnostic, Conservation and Restoration of Cultural Heritage*, eds. G. Lazzara and R. Fakhrullin, Elsevier, Editon edn., 2019, pp. 47-59.
